# Supplementary material
Source: HighWire-hosted journal article supplement (http://qualitysafety.bmj.com/highwire/filestream/162959/field_highwire_adjunct_files/2/bmjqs-2022-015162supp003_data_supplement.pdf)
Supplement: bmjqs-2022-015162supp003_data_supplement.pdf [file bmjqs-2022-015162supp003_data_supplement.pdf]

## DAVINCI interviews

### Nodes\Coding frame

| Name                                            |
|-------------------------------------------------|
| 1. Challenges of providing care for PWD         |
| bed crisis                                      |
| behaviour eg aggressive-disruptive-uncoperative |
| Demand on staff time - stressful                |
| difficulty establishing a baseline-history      |
| discharge                                       |
| environment                                     |
| lack of motivation                              |
| nutrition                                       |
| staff busy                                      |
| staff turnover                                  |
| staff understanding and compassion for PWD      |
| why difficult to overcome                       |
| 2. Description of VIDS                          |
| Type(s)                                         |
| When is VID applied                             |
| Where VIDs placed                               |
| Who applied to                                  |
| Who places VIDs                                 |
| 3. Purpose of VIDS                              |

| Name                                                                      |
|---------------------------------------------------------------------------|
| Organisational-co-ordination of care                                      |
| Improve organisational status                                             |
| Organisational                                                            |
| staff and ward level                                                      |
| VID for staff (signifier) - signals prompting for various responses       |
| Compassion and empathy                                                    |
| consider additional needs                                                 |
| Manage and reduce risk                                                    |
| Modify communication style and approach                                   |
| reassurance for relatives and patients                                    |
| sense-making - dementia as a reason for distress and how to avoid-respond |
| 4. Limitations, negative and unintended consequences of VIDS              |
| doesn't tell you about the individual person                              |
| focus on the label not the person                                         |
| may not want or recognise diagnosis                                       |
| Meaning of label - stigmatising-negative attitudes-fear-judgmental        |
| Obscures differences across specturm of disease (severity)                |
| overlooks specific individual needs                                       |
| 5. Practical challenges                                                   |
| delirium                                                                  |
| getting a diagnosis of dementia in place                                  |
| inconsistency                                                             |
| issue of multiple identifiers                                             |

| Name                                                                                                                              |
|-----------------------------------------------------------------------------------------------------------------------------------|
| lost at transfer between wards                                                                                                    |
| mislabelling                                                                                                                      |
| patients missed from the system                                                                                                   |
| 6. Ethical challenges - tensions - points of contention                                                                           |
| acting in the patient's best interests                                                                                            |
| confidentiality - privacy and disclosure                                                                                          |
| Need for consent                                                                                                                  |
| stigma                                                                                                                            |
| whether VIDs should encompass any memory issues or confusion without diagnosis                                                    |
| 7. What's needed to make VID work                                                                                                 |
| 8. What's the role of other elements of local dementia strategies and how do they support VIDS or impact on effectiveness of VIDS |
| 9. Ideal system                                                                                                                   |
| better at assessing difference between dementia and delirium                                                                      |
| Consent from patients or relatives                                                                                                |
| everyone would know and understand                                                                                                |
| how it works                                                                                                                      |
| standardised                                                                                                                      |
| what information                                                                                                                  |
| where applied                                                                                                                     |
